# Supplementary material for: Method of Glyphosate, AMPA, and Glufosinate Ammonium Determination in Beebread by Liquid Chromatography—Tandem Mass Spectrometry after Molecularly Imprinted Solid-Phase Extraction
Source: MDPI journal article supplement (doi:10.3390/molecules27175741), 2022-09-05
Supplement: s1 [file s1]

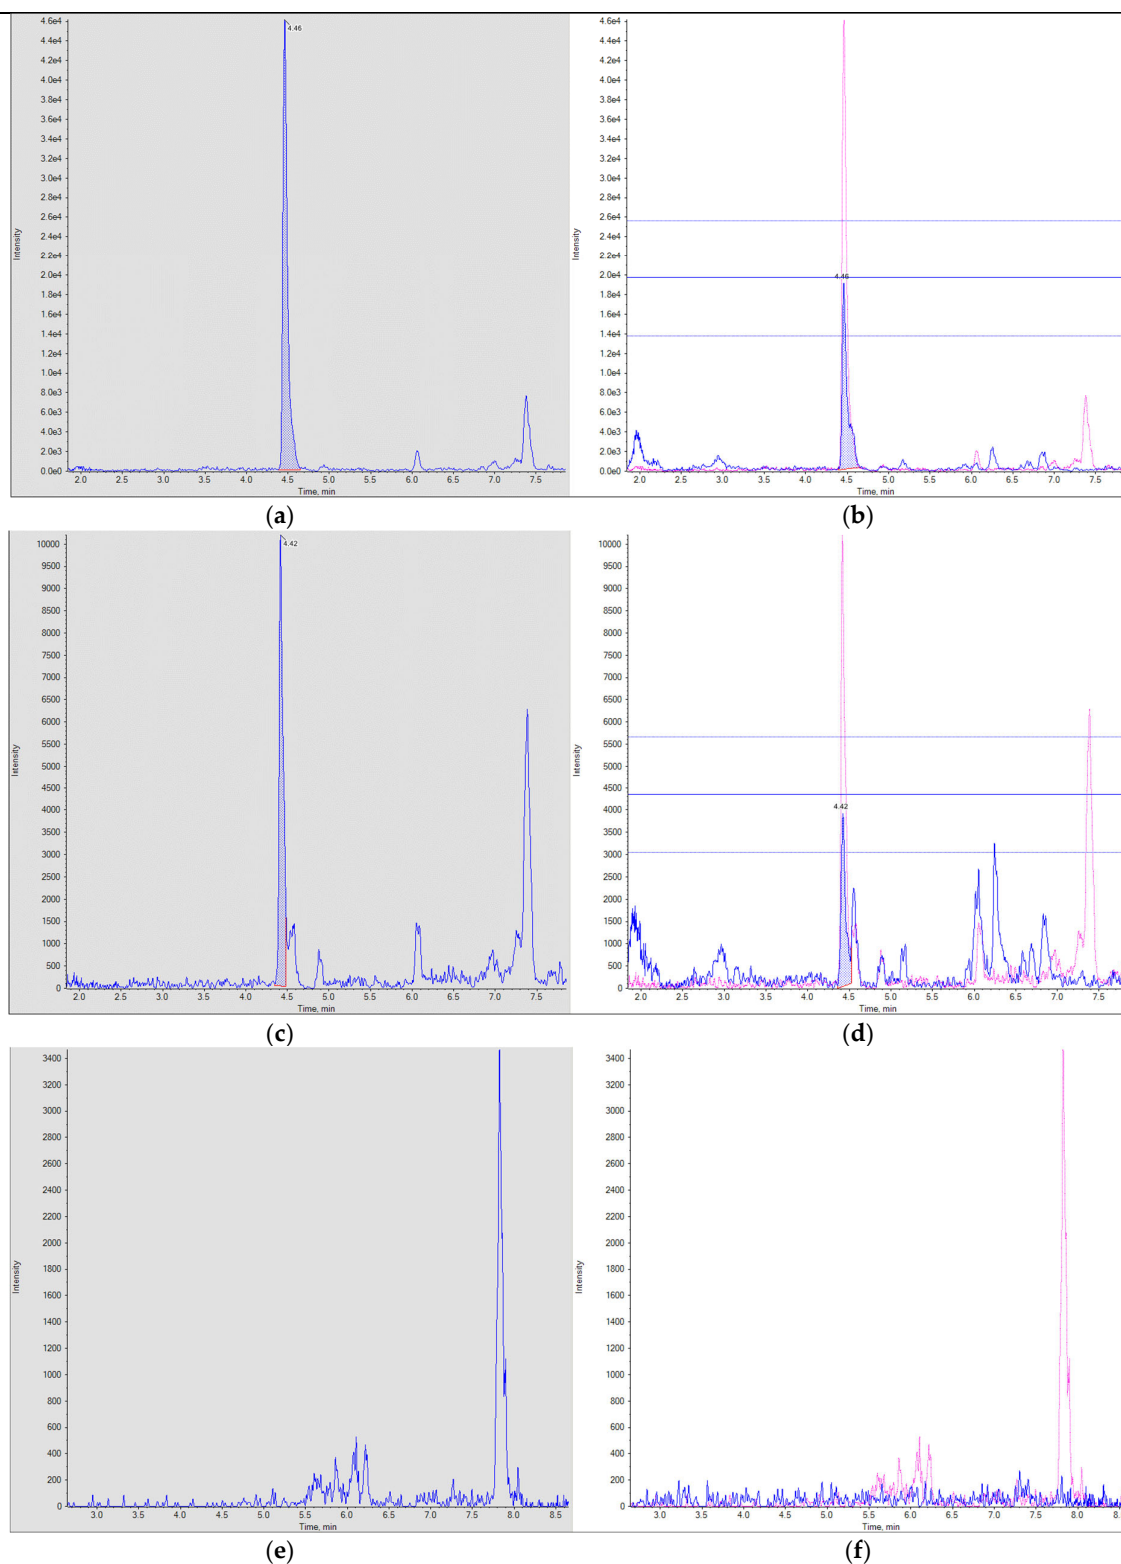

**Figure S1.** Chromatograms of Glyphosate-FMOC derivative for quantitative (MRM 1, 390>150) and qualitative analysis (MRM 2, 390>124): (a) beebread sample spiked at the level of 100 µg/kg – quantitative; (b) beebread sample spiked at the level of 100 µg/kg – qualitative; (c) Beebread sample spiked at the level of 10 µg/kg – quantitative; (d) Beebread sample spiked at the level of 10 µg/kg – qualitative; (e) Blank beebread sample – quantitative; (f) Blank beebread sample – qualitative.

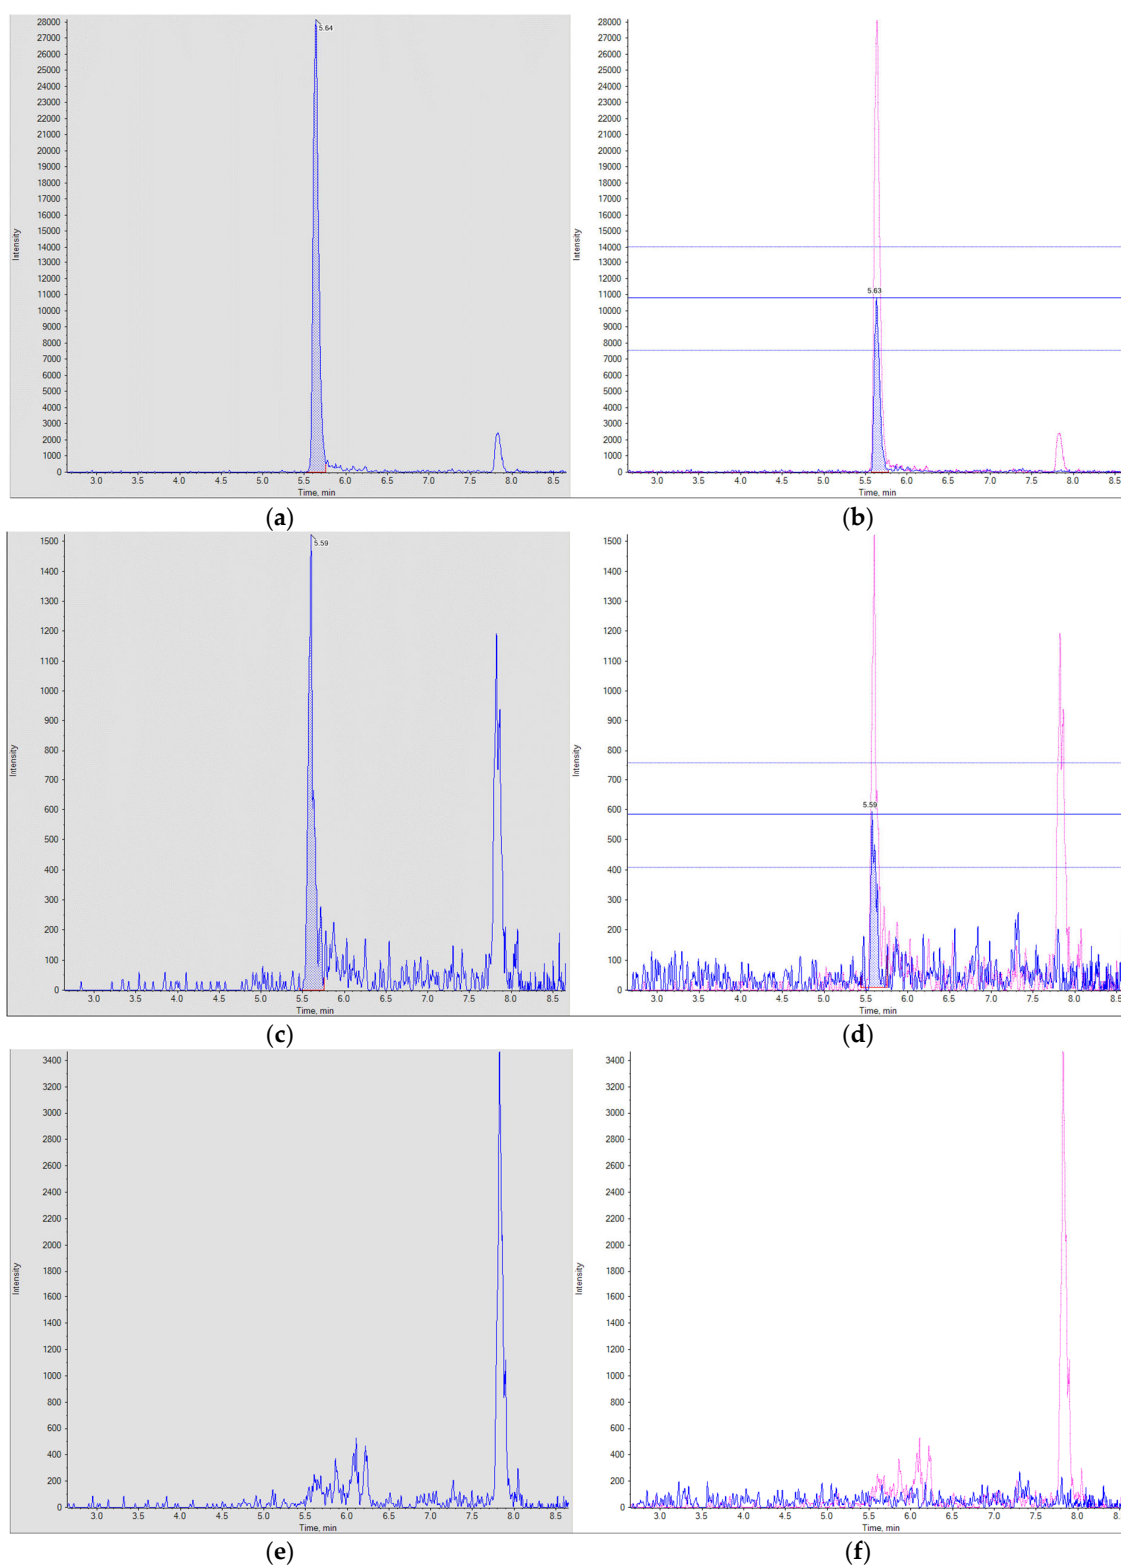

**Figure S2.** Chromatograms of AMPA-FMOC derivative for quantitative (MRM 1, 332>110) and qualitative analysis (MRM 2, 332>136): (a) beebread sample spiked at the level of 100 µg/kg – quantitative; (b) beebread sample spiked at the level of 100 µg/kg – qualitative; (c) Beebread sample spiked at the level of 10 µg/kg – quantitative; (d) Beebread sample spiked at the level of 10 µg/kg – qualitative; (e) Blank beebread sample – quantitative; (f) Blank beebread sample – qualitative.

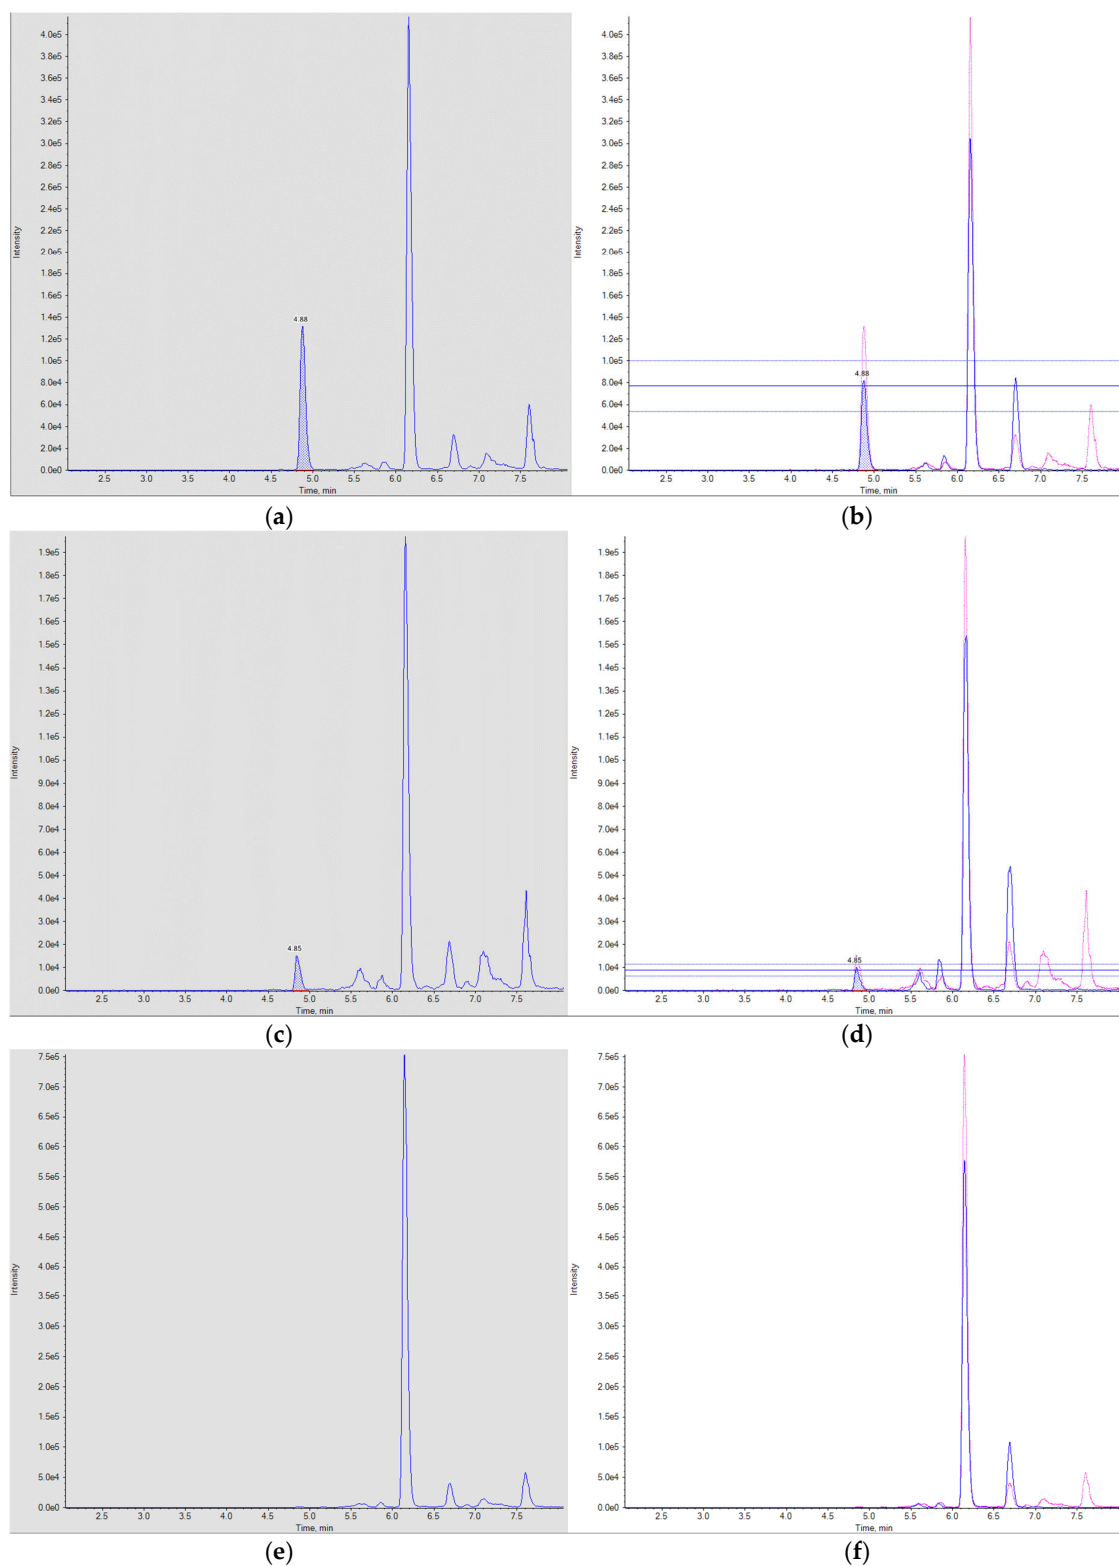

**Figure S3.** Chromatograms of Glufosinate ammonium-FMOC derivative for quantitative (MRM 1, 402>180) and qualitative analysis (MRM 2, 402>206): (a) beebread sample spiked at the level of 100 µg/kg – quantitative; (b) beebread sample spiked at the level of 100 µg/kg – qualitative; (c) Beebread sample spiked at the level of 10 µg/kg – quantitative; (d) Beebread sample spiked at the level of 10 µg/kg – qualitative; (e) Blank beebread sample – quantitative; (f) Blank beebread sample – qualitative.
